# Supplementary material for: The Impact of SMAD4 Loss on Outcome in Patients with Advanced Pancreatic Cancer Treated with Systemic Chemotherapy
Source: MDPI journal article supplement (doi:10.3390/ijms18051094), 2017-05-19
Supplement: s1 [file s1]

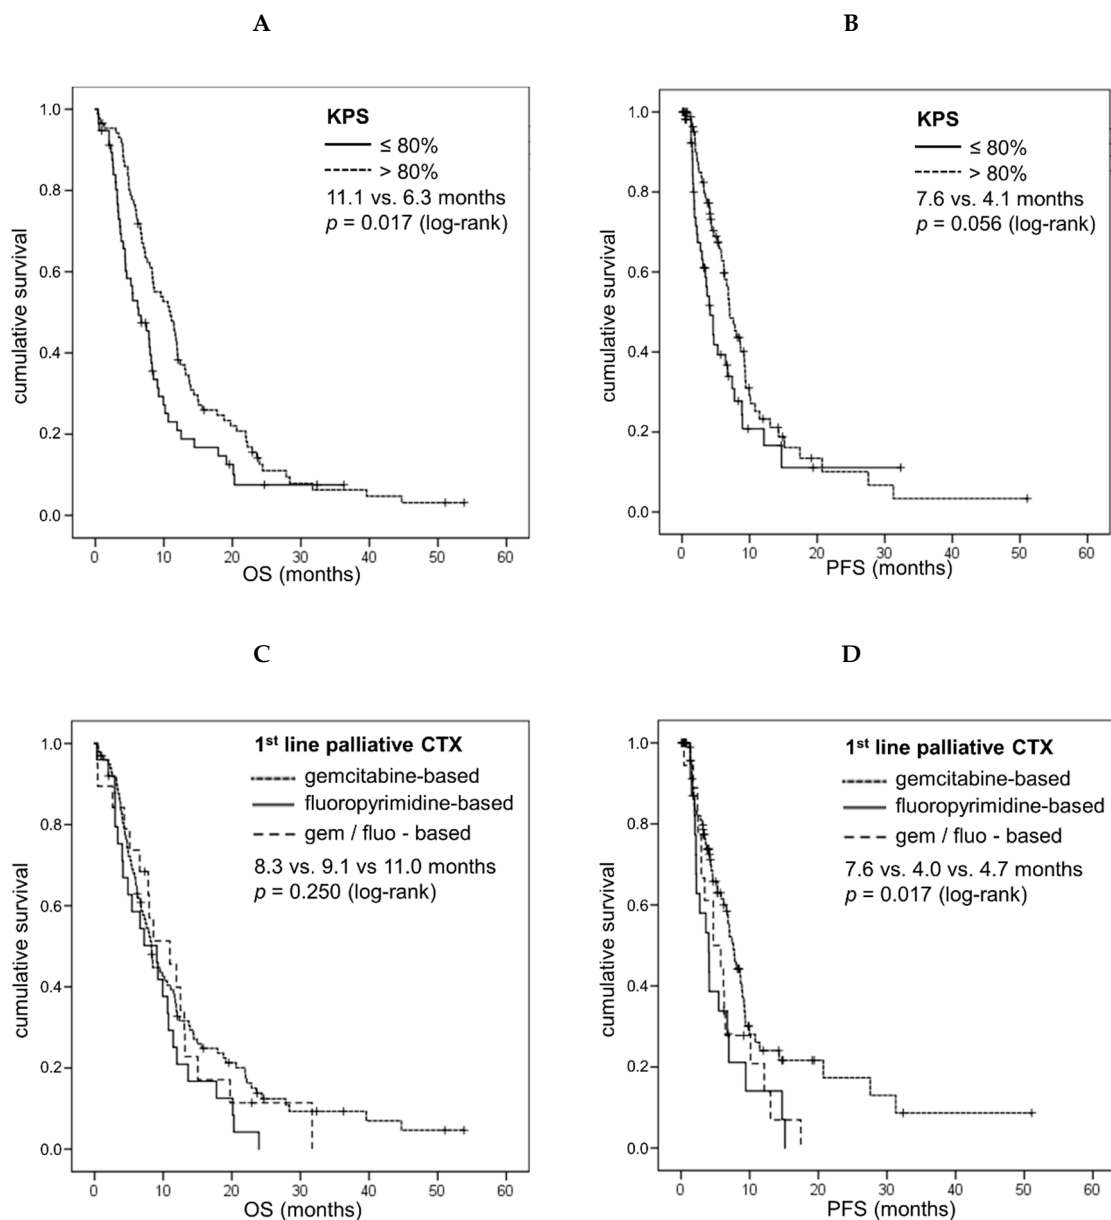

**Figure S1** Univariate analysis (Kaplan–Meier curves and log-rank tests) of Karnofsky performance scale (KPS) groups (S1A, S1B) as well as type of first-line chemotherapy (CTX, S1C, S1D) and OS or PFS in palliatively-treated aPC pts. Crossed lines indicate censored cases.

**Table S1** Correlation of SMAD4 expression status and pts' clinicopathological characteristics using cross tabulations and  $\chi^2$  tests.

|                                  |                  | <b>SMAD4</b>    |             | <b>p (<math>\chi^2</math>)</b> |
|----------------------------------|------------------|-----------------|-------------|--------------------------------|
|                                  |                  | <b><i>n</i></b> | <b>Loss</b> |                                |
| Sex                              | male             | 84              | 55          | 0.434                          |
|                                  | female           | 59              | 37          |                                |
| Age group                        | < 60 years       | 55              | 38          | 0.225                          |
|                                  | ≥ 60 years       | 88              | 54          |                                |
| KPS                              | ≤ 80             | 57              | 35          | 0.337                          |
|                                  | > 80             | 86              | 57          |                                |
| Stage at start of palliative CTX | locally advanced | 15              | 11          | 0.321                          |
|                                  | metastatic       | 128             | 81          |                                |
| Tumor grade                      | G1 - G2          | 61              | 42          | 0.213                          |
|                                  | G3 - G4          | 82              | 32          |                                |
| Metastatic sites                 | 0                | 15              | 11          | 0.155                          |
|                                  | 1                | 90              | 60          |                                |
|                                  | >1               | 38              | 21          |                                |
